# Supplementary material for: The CIMP-high phenotype is associated with energy metabolism alterations in colon adenocarcinoma
Source: BMC Med Genet. 2019 Apr 9;20(Suppl 1):52. doi: 10.1186/s12881-019-0771-5 (PMC6454590; doi:10.1186/s12881-019-0771-5)
Supplement: Supplementary file 6 — Table S3. Differential expression profiles of “Glycolysis/Gluconeogenesis” KEGG pathway genes in CIMP-high colon adenocarcinomas compared to non-CIMP ones (TCGA data). The color scale indicates the degree of change. (XLSX 266 kb) [file 12881_2019_771_MOESM6_ESM.xlsx]

## Sheet: DESeq, brief
Gene symbol	LogFC	FDR
PKLR	-4.44864	3.52976e-28
PCK1	-1.09953	0.00142527
FBP2	-1.01788	0.00214305
ADH4	-0.879785	0.0364545
ACSS1	-0.559591	0.00726706
ACSS2	-0.441103	0.00284304
ALDH1B1	-0.428532	0.0108402
PDHA1	-0.374465	0.00102046
PCK2	-0.342947	0.0330452
G6PC3	-0.304756	0.0390861
ADPGK	0.190646	0.032032
BPGM	0.274511	0.0264601
ALDOA	0.284588	0.0466591
PGM2	0.294252	0.0155825
GPI	0.309246	0.00732773
TPI1	0.332094	0.00745799
HK1	0.336046	0.00372313
MINPP1	0.340564	0.00462814
LDHA	0.37118	0.00117226
ENO1	0.508532	9.18901e-06
HK2	0.5293	0.000293452
ALDH3A2	0.53893	3.26408e-06
PGAM1	0.579594	2.10476e-07
GAPDH	0.659216	1.99796e-05
PGAM4	0.761088	0.0107332
PKM	0.867969	2.98672e-11
HK3	0.996698	0.000228631
PFKP	1.09106	3.15976e-13
ENO2	1.67502	3.36793e-20

## Sheet: edgeR, extended
Gene ID	Symbol	Biotype	Name	RefSeq_Summary		non-CIMP [Nature 2012]	CIMP-high [Nature 2012]	Annotation	Score	LogCPM rank (%)	LogFC	trimmed LogFC	LogCPM	F	p (QLF test)	FDR (QLF test)	p (LR test)	p (ex. test)	p (Mann-Wh.)	FDR (Mann-Wh.)	p (t-test)	Spearman r	Pearson r	p (Spearman)	p (Pearson)	CPMs:	TCGA-AA-3514	TCGA-AA-3812	TCGA-AA-3667	TCGA-AA-3542	TCGA-AA-A01T	TCGA-AA-A01S	TCGA-AA-A00O	TCGA-AA-A02F	TCGA-AA-A01X	TCGA-AA-3534	TCGA-AA-3529	TCGA-AA-A02J	TCGA-AA-3531	TCGA-AA-3679	TCGA-AA-3517	TCGA-AA-3519	TCGA-AA-3678	TCGA-AA-A00W	TCGA-AA-A00L	TCGA-AA-A00Z	TCGA-AA-3973	TCGA-AA-3521	TCGA-AA-A02H
CIMP-high vs non-CIMP [Nature 2012]																											0	0	0	0	0	0	0	0	0	0	0	0	0	0	0	0	0	0	0	0	0	0	0
MSI_status																											0	0	1	0	0	1	1	0	0	0	1	0	1	0	1	0	0	0	0	0	1	0	0
Tumor vs Normal																											1	1	1	1	1	1	1	1	1	1	1	1	1	1	1	1	1	1	1	1	1	1	1
BRAF_mut																											0	0	0	0			0	0		0	0	0	0	0	0	0	0	0	0	0	0	0	0
KRAS_mut																											0	0	0	0			0	0		0	0	0	0	0	0	0	0	0	0	0	0	1	0
APC_mut																											0	1	1	1			1	1		0	1	1	1	1	0	1	1	1	1	1	1	1	1
TP53_mut																											0	0	1	1			1	1		0	0	1	1	1	1	1	0	1	1	0	0	0	1
hypermut																											0	0	0	0			0	0		0	0	0	0	0	0	0	0	0	0	0	0	0	0
ENSG00000111674	ENO2	protein_coding	enolase 2	This gene encodes one of the three enolase isoenzymes found in mammals. This isoenzyme, a homodimer, is found in mature neurons and cells of neuronal origin. A switch from alpha enolase to gamma enolase occurs in neural tissue during development in rats and primates. [provided by RefSeq, Jul 2008]. Publication Note: This RefSeq record includes a subset of the publications that are available for t…				hsa00010 (Glycolysis / Gluconeogenesis), hsa01100 (Metabolic pathways), hsa01200 (Carbon metabolism), hsa01230 (Biosynthesis of amino acids), hsa03018 (RNA degradation), hsa04066 (HIF-1 signaling pathway), GO:0006094 (gluconeogenesis), GO:0006096 (glycolytic process), GO:0061621 (canonical glycolysis), GO:0000015 (phosphopyruvate hydratase complex), GO:0001917 (photoreceptor inner segment), GO:00…	721.697	60.2854	1.69484	1.68867	4.95047	83.5855	1.19267e-15	6.19105e-13	5.43222e-21	5.07104e-21	4.0947e-11	9.9486e-09	5.33222e-06	0.593004	0.58974	3.18422e-13	4.61176e-13		17.9793	64.4995	22.9282	20.0753	78.3173	12.7153	9.68831	51.1911	15.4302	20.576	13.7399	9.97104	13.1224	8.59932	42.0261	12.1234	7.93511	6.41369	5.23766	15.4691	29.7951	16.8044	10.6809
ENSG00000143627	PKLR	protein_coding	pyruvate kinase L/R	The protein encoded by this gene is a pyruvate kinase that catalyzes the transphosphorylation of phohsphoenolpyruvate into pyruvate and ATP, which is the rate-limiting step of glycolysis. Defects in this enzyme, due to gene mutations or genetic variations, are the common cause of chronic hereditary nonspherocytic hemolytic anemia (CNSHA or HNSHA). Multiple transcript variants encoding different i…				hsa00010 (Glycolysis / Gluconeogenesis), hsa00230 (Purine metabolism), hsa00620 (Pyruvate metabolism), hsa01100 (Metabolic pathways), hsa01200 (Carbon metabolism), hsa01230 (Biosynthesis of amino acids), hsa04910 (Insulin signaling pathway), hsa04930 (Type II diabetes mellitus), hsa04932 (Non-alcoholic fatty liver disease (NAFLD)), hsa04950 (Maturity onset diabetes of the young), GO:0001666 (resp…	568.177	22.2744	-4.3619	-2.56362	1.99006	66.1044	3.18947e-13	5.36163e-11	5.30707e-18	7.73629e-18	1.15334e-09	1.16109e-07	8.02542e-08	-0.546852	-0.300316	4.17147e-11	0.000666991		23.9086	9.04566	12.2217	1.95857	2.81428	5.02581	37.7884	0.13651	1.62655	7.96636	5.56138	20.2968	35.8513	31.8048	20.1833	23.6861	27.1143	1.99847	5.43719	4.39096	0.278894	3.61684	2.52969
ENSG00000067057	PFKP	protein_coding	phosphofructokinase, platelet	The PFKP gene encodes the platelet isoform of phosphofructokinase (PFK) (ATP:D-fructose-6-phosphate-1-phosphotransferase, EC 2.7.1.11). PFK catalyzes the irreversible conversion of fructose-6-phosphate to fructose-1,6-bisphosphate and is a key regulatory enzyme in glycolysis. The PFKP gene, which maps to chromosome 10p, is also expressed in fibroblasts. See also the muscle (PFKM; MIM 610681) and …				hsa00010 (Glycolysis / Gluconeogenesis), hsa00030 (Pentose phosphate pathway), hsa00051 (Fructose and mannose metabolism), hsa00052 (Galactose metabolism), hsa01100 (Metabolic pathways), hsa01200 (Carbon metabolism), hsa01230 (Biosynthesis of amino acids), hsa03018 (RNA degradation), hsa04152 (AMPK signaling pathway), hsa04919 (Thyroid hormone signaling pathway), hsa05230 (Central carbon metaboli…	375.369	93.8113	1.10423	1.06875	7.36538	44.8117	6.15218e-10	3.13748e-08	7.41558e-12	6.79407e-12	2.68396e-07	7.71336e-06	6.51484e-05	0.462231	0.504785	5.74637e-08	1.94018e-09		199.94	245.413	283.522	73.4463	351.141	256.618	69.1448	164.267	86.6906	19.9842	93.8425	75.6696	150.94	117.292	188.602	112.754	95.4784	182.279	54.9705	50.2745	75.8126	113.513	117.912
ENSG00000072210	ALDH3A2	protein_coding	aldehyde dehydrogenase 3 family member A2	Aldehyde dehydrogenase isozymes are thought to play a major role in the detoxification of aldehydes generated by alcohol metabolism and lipid peroxidation. This gene product catalyzes the oxidation of long-chain aliphatic aldehydes to fatty acid. Mutations in the gene cause Sjogren-Larsson syndrome. Alternatively spliced transcript variants encoding different isoforms have been found for this gen…				hsa00010 (Glycolysis / Gluconeogenesis), hsa00053 (Ascorbate and aldarate metabolism), hsa00071 (Fatty acid degradation), hsa00280 (Valine, leucine and isoleucine degradation), hsa00310 (Lysine degradation), hsa00330 (Arginine and proline metabolism), hsa00340 (Histidine metabolism), hsa00380 (Tryptophan metabolism), hsa00410 (beta-Alanine metabolism), hsa00561 (Glycerolipid metabolism), hsa00620…	244.67	83.7156	0.532539	0.568637	6.3141	26.8187	8.44397e-07	1.42834e-05	2.57196e-07	2.46454e-07	2.11206e-07	6.37882e-06	4.49973e-07	0.466255	0.449976	4.2528e-08	1.40385e-07		65.0315	46.1132	46.9675	57.484	79.2018	52.4192	143.676	88.2307	101.989	77.5696	56.4083	34.3666	73.1467	87.0049	53.1045	37.5614	36.8806	78.9162	49.1841	34.9666	74.0463	55.9219	84.8852
ENSG00000067225	PKM	protein_coding	pyruvate kinase M1/2	This gene encodes a protein involved in glycolysis. The encoded protein is a pyruvate kinase that catalyzes the transfer of a phosphoryl group from phosphoenolpyruvate to ADP, generating ATP and pyruvate. This protein has been shown to interact with thyroid hormone and may mediate cellular metabolic effects induced by thyroid hormones. This protein has been found to bind Opa protein, a bacterial …				hsa00010 (Glycolysis / Gluconeogenesis), hsa00230 (Purine metabolism), hsa00620 (Pyruvate metabolism), hsa01100 (Metabolic pathways), hsa01200 (Carbon metabolism), hsa01230 (Biosynthesis of amino acids), hsa04922 (Glucagon signaling pathway), hsa04930 (Type II diabetes mellitus), hsa05165 (Human papillomavirus infection), hsa05203 (Viral carcinogenesis), hsa05230 (Central carbon metabolism in can…	242.155	99.6689	0.81169	0.690145	10.5227	29.1548	3.13714e-07	6.20655e-06	3.93056e-08	3.64484e-08	9.78474e-06	0.000135727	0.00129474	0.397348	0.414994	4.47062e-06	1.4944e-06		2222.87	2488.05	1803.45	1571.75	2222.23	2259.3	759.386	1672.15	1466.84	1431.4	1623.22	1198.38	1653.18	998.596	1363.67	1393.56	1097.2	951.735	751.23	840.326	523.158	947.223	787.999
ENSG00000159399	HK2	protein_coding	hexokinase 2	Hexokinases phosphorylate glucose to produce glucose-6-phosphate, the first step in most glucose metabolism pathways. This gene encodes hexokinase 2, the predominant form found in skeletal muscle. It localizes to the outer membrane of mitochondria. Expression of this gene is insulin-responsive, and studies in rat suggest that it is involved in the increased rate of glycolysis seen in rapidly grow…				hsa00010 (Glycolysis / Gluconeogenesis), hsa00051 (Fructose and mannose metabolism), hsa00052 (Galactose metabolism), hsa00500 (Starch and sucrose metabolism), hsa00520 (Amino sugar and nucleotide sugar metabolism), hsa00524 (Neomycin, kanamycin and gentamicin biosynthesis), hsa01100 (Metabolic pathways), hsa01200 (Carbon metabolism), hsa04066 (HIF-1 signaling pathway), hsa04910 (Insulin signalin…	185.771	92.2702	0.598804	0.59306	7.14815	22.3527	5.89574e-06	7.1537e-05	1.92342e-06	1.81614e-06	5.32196e-05	0.00051487	0.000684082	0.363146	0.380185	3.15042e-05	1.22401e-05		98.2485	209.722	146.054	32.6102	213.885	124.741	65.4463	94.2827	122.431	91.6815	107.068	172.503	122.497	85.108	117.736	86.9658	190.668	318.314	187.009	122.826	68.9797	163.481	145.317
ENSG00000111640	GAPDH	protein_coding	glyceraldehyde-3-phosphate dehydrogenase	This gene encodes a member of the glyceraldehyde-3-phosphate dehydrogenase protein family. The encoded protein has been identified as a moonlighting protein based on its ability to perform mechanistically distinct functions. The product of this gene catalyzes an important energy-yielding step in carbohydrate metabolism, the reversible oxidative phosphorylation of glyceraldehyde-3-phosphate in the…				hsa00010 (Glycolysis / Gluconeogenesis), hsa01100 (Metabolic pathways), hsa01200 (Carbon metabolism), hsa01230 (Biosynthesis of amino acids), hsa04066 (HIF-1 signaling pathway), hsa05010 (Alzheimer disease), GO:0000226 (microtubule cytoskeleton organization), GO:0006094 (gluconeogenesis), GO:0016241 (regulation of macroautophagy), GO:0017148 (negative regulation of translation), GO:0035606 (pepti…	162.842	99.9278	0.746386	0.584574	11.8563	20.2662	1.49806e-05	0.000155139	3.85201e-06	3.58654e-06	0.000269105	0.00185251	0.0134356	0.327435	0.321545	0.000193508	0.000255725		10737.5	8020.16	6140.63	6522.82	7624.44	6715.94	1778.07	4117.18	3758.2	3181.54	4284.18	4219.41	6033.56	2762.79	2478.74	3917.46	2836.5	3237.19	2646.37	2129.09	1785.62	3942.75	1531.17
ENSG00000171314	PGAM1	protein_coding	phosphoglycerate mutase 1	Phosphoglyceric acid mutase (EC 2.7.5.3) is widely distributed in mammalian tissues where it catalyzes the reversible reaction of 3-phosphoglycerate (3-PGA) to 2-phosphoglycerate (2-PGA) in the glycolytic pathway (summary by Chen et al., 1974 [PubMed 4811757]).[supplied by OMIM, Nov 2010]. Publication Note: This RefSeq record includes a subset of the publications that are available for this gene.…				hsa00010 (Glycolysis / Gluconeogenesis), hsa00260 (Glycine, serine and threonine metabolism), hsa01100 (Metabolic pathways), hsa01200 (Carbon metabolism), hsa01230 (Biosynthesis of amino acids), hsa04922 (Glucagon signaling pathway), hsa05230 (Central carbon metabolism in cancer), GO:0006094 (gluconeogenesis), GO:0006096 (glycolytic process), GO:0006110 (regulation of glycolytic process), GO:0043…	161.533	68.6894	0.489981	0.527204	5.40416	19.0686	2.57819e-05	0.000247122	1.26081e-05	1.23085e-05	7.58952e-05	0.000679987	0.000152254	0.355601	0.378863	4.70861e-05	1.31968e-05		68.6656	71.972	50.7047	54.8399	31.6003	48.9514	26.4519	20.5219	21.321	32.958	45.379	36.8889	46.1483	44.9568	25.7449	38.6826	30.5518	26.4913	21.8984	22.116	21.1959	20.922	17.5673
ENSG00000160883	HK3	protein_coding	hexokinase 3	Hexokinases phosphorylate glucose to produce glucose-6-phosphate, the first step in most glucose metabolism pathways. This gene encodes hexokinase 3. Similar to hexokinases 1 and 2, this allosteric enzyme is inhibited by its product glucose-6-phosphate. [provided by RefSeq, Apr 2009]. Publication Note: This RefSeq record includes a subset of the publications that are available for this gene. Plea…				hsa00010 (Glycolysis / Gluconeogenesis), hsa00051 (Fructose and mannose metabolism), hsa00052 (Galactose metabolism), hsa00500 (Starch and sucrose metabolism), hsa00520 (Amino sugar and nucleotide sugar metabolism), hsa00524 (Neomycin, kanamycin and gentamicin biosynthesis), hsa01100 (Metabolic pathways), hsa01200 (Carbon metabolism), hsa04066 (HIF-1 signaling pathway), hsa04910 (Insulin signalin…	126.081	29.4985	0.982729	1.06059	2.6832	13.8001	0.00030254	0.00193511	9.21612e-05	8.43263e-05	5.71655e-05	0.000541996	0.0268178	0.361637	0.21459	3.41684e-05	0.0162545		10.5836	87.3103	7.4744	1.95857	1.68857	1.10568	1.64822	0.819058	1.84635	2.64028	3.64527	0.788225	3.45328	2.02337	3.58814	3.15347	3.24472	0.92952	1.04753	2.09477	0.929646	5.00794	1.12431
ENSG00000074800	ENO1	protein_coding	enolase 1	This gene encodes alpha-enolase, one of three enolase isoenzymes found in mammals. Each isoenzyme is a homodimer composed of 2 alpha, 2 gamma, or 2 beta subunits, and functions as a glycolytic enzyme. Alpha-enolase in addition, functions as a structural lens protein (tau-crystallin) in the monomeric form. Alternative splicing of this gene results in a shorter isoform that has been shown to bind t…				hsa00010 (Glycolysis / Gluconeogenesis), hsa01100 (Metabolic pathways), hsa01200 (Carbon metabolism), hsa01230 (Biosynthesis of amino acids), hsa03018 (RNA degradation), hsa04066 (HIF-1 signaling pathway), GO:0000122 (negative regulation of transcription from RNA polymerase II promoter), GO:0006094 (gluconeogenesis), GO:0006351 (transcription, DNA-templated), GO:0009615 (response to virus), GO:00…	97.352	99.6809	0.456721	0.509249	10.5429	10.3754	0.00161954	0.0077476	0.00109998	0.00104747	0.000216139	0.00156439	0.000732607	0.332464	0.324448	0.000151828	0.000223044		2572.7	1842.66	1094.39	2764.81	2103.87	3564.46	640.514	1135.26	1051.67	1228.41	1852.87	2119.77	1298.81	743.462	631.917	1588.3	737.066	1528.92	1810.83	1862.01	491.364	655.873	683.719
ENSG00000131069	ACSS2	protein_coding	acyl-CoA synthetase short chain family member 2	This gene encodes a cytosolic enzyme that catalyzes the activation of acetate for use in lipid synthesis and energy generation. The protein acts as a monomer and produces acetyl-CoA from acetate in a reaction that requires ATP. Expression of this gene is regulated by sterol regulatory element-binding proteins, transcription factors that activate genes required for the synthesis of cholesterol and…				hsa00010 (Glycolysis / Gluconeogenesis), hsa00620 (Pyruvate metabolism), hsa00630 (Glyoxylate and dicarboxylate metabolism), hsa00640 (Propanoate metabolism), hsa01100 (Metabolic pathways), hsa01200 (Carbon metabolism), GO:0006069 (ethanol oxidation), GO:0008610 (lipid biosynthetic process), GO:0019413 (acetate biosynthetic process), GO:0019427 (acetyl-CoA biosynthetic process from acetate), GO:0…	96.9618	93.8294	-0.47283	-0.506178	7.36616	10.4367	0.00157058	0.00755324	0.00110496	0.00117814	0.000275023	0.00188466	0.00382206	-0.326932	-0.252283	0.000198213	0.004535		243.868	269.895	318.874	240.121	462.104	506.652	306.649	115.715	238.883	52.8511	89.4962	191.617	464.811	154.914	300.776	255.642	174.765	175.307	127.599	145.345	110.721	145.508	219.521
ENSG00000156515	HK1	protein_coding	hexokinase 1	Hexokinases phosphorylate glucose to produce glucose-6-phosphate, the first step in most glucose metabolism pathways. This gene encodes a ubiquitous form of hexokinase which localizes to the outer membrane of mitochondria. Mutations in this gene have been associated with hemolytic anemia due to hexokinase deficiency. Alternative splicing of this gene results in five transcript variants which enco…				hsa00010 (Glycolysis / Gluconeogenesis), hsa00051 (Fructose and mannose metabolism), hsa00052 (Galactose metabolism), hsa00500 (Starch and sucrose metabolism), hsa00520 (Amino sugar and nucleotide sugar metabolism), hsa00524 (Neomycin, kanamycin and gentamicin biosynthesis), hsa01100 (Metabolic pathways), hsa01200 (Carbon metabolism), hsa04066 (HIF-1 signaling pathway), hsa04910 (Insulin signalin…	96.4343	90.5545	0.388536	0.414978	6.93143	10.6373	0.00142085	0.00693965	0.00105753	0.0010171	0.000469227	0.0028772	0.00481512	0.314357	0.286948	0.000356621	0.00117675		167.552	240.497	216.556	169.318	291.479	254.356	153.083	80.5407	140.015	67.4182	171.515	132.461	130.345	83.7169	93.2021	73.511	114.882	175.772	100.064	121.336	79.4847	112.512	91.9121
ENSG00000131828	PDHA1	protein_coding	pyruvate dehydrogenase E1 alpha 1 subunit	The pyruvate dehydrogenase (PDH) complex is a nuclear-encoded mitochondrial multienzyme complex that catalyzes the overall conversion of pyruvate to acetyl-CoA and CO(2), and provides the primary link between glycolysis and the tricarboxylic acid (TCA) cycle. The PDH complex is composed of multiple copies of three enzymatic components: pyruvate dehydrogenase (E1), dihydrolipoamide acetyltransfera…				hsa00010 (Glycolysis / Gluconeogenesis), hsa00020 (Citrate cycle (TCA cycle)), hsa00620 (Pyruvate metabolism), hsa01100 (Metabolic pathways), hsa01200 (Carbon metabolism), hsa04066 (HIF-1 signaling pathway), hsa04922 (Glucagon signaling pathway), hsa05230 (Central carbon metabolism in cancer), GO:0006006 (glucose metabolic process), GO:0006086 (acetyl-CoA biosynthetic process from pyruvate), GO:0…	78.6359	91.8247	-0.359475	-0.362103	7.09328	9.00131	0.00324383	0.013676	0.00264428	0.00277389	0.00296586	0.0126355	0.0021683	-0.267078	-0.250059	0.00260461	0.00491612		116.292	124.083	98.5813	192.625	184.134	181.633	105.968	210.498	170.788	90.9986	122.397	227.6	342.628	81.5671	86.1155	171.549	103.156	209.374	302.388	180.916	160.736	88.5292	137.306
ENSG00000105220	GPI	protein_coding	glucose-6-phosphate isomerase	This gene encodes a member of the glucose phosphate isomerase protein family. The encoded protein has been identified as a moonlighting protein based on its ability to perform mechanistically distinct functions. In the cytoplasm, the gene product functions as a glycolytic enzyme (glucose-6-phosphate isomerase) that interconverts glucose-6-phophsate and fructose-6-phosphate. Extracellularly, the e…				hsa00010 (Glycolysis / Gluconeogenesis), hsa00030 (Pentose phosphate pathway), hsa00500 (Starch and sucrose metabolism), hsa00520 (Amino sugar and nucleotide sugar metabolism), hsa01100 (Metabolic pathways), hsa01200 (Carbon metabolism), GO:0001525 (angiogenesis), GO:0001701 (in utero embryonic development), GO:0001707 (mesoderm formation), GO:0005975 (carbohydrate metabolic process), GO:0006094 …	66.6259	98.808	0.350768	0.350526	9.15146	8.05228	0.00528663	0.0202388	0.00426194	0.00409779	0.0123919	0.0388308	0.0123015	0.224828	0.25998	0.01171	0.00341172		726.249	726.504	738.249	860.987	881.673	1183.23	560.676	971.676	394.987	300.309	578.197	725.6	732.597	406.318	383.259	599.02	379.054	581.043	565.169	1160.7	347.873	543.25	417.68
ENSG00000198099	ADH4	protein_coding	alcohol dehydrogenase 4 (class II), pi polypeptide	This gene encodes class II alcohol dehydrogenase 4 pi subunit, which is a member of the alcohol dehydrogenase family. Members of this enzyme family metabolize a wide variety of substrates, including ethanol, retinol, other aliphatic alcohols, hydroxysteroids, and lipid peroxidation products. Class II alcohol dehydrogenase is a homodimer composed of 2 pi subunits. It exhibits a high activity for o…				hsa00010 (Glycolysis / Gluconeogenesis), hsa00071 (Fatty acid degradation), hsa00350 (Tyrosine metabolism), hsa00830 (Retinol metabolism), hsa00980 (Metabolism of xenobiotics by cytochrome P450), hsa00982 (Drug metabolism - cytochrome P450), hsa01100 (Metabolic pathways), hsa05204 (Chemical carcinogenesis), GO:0001523 (retinoid metabolic process), GO:0006066 (alcohol metabolic process), GO:000606…	65.7686	2.11908	-1.02565	-0.821362	-0.0321973	6.53861	0.0117236	0.0382996	0.00848445	0.00992604	0.0011507	0.00593611	0.0413077	-0.29221	-0.190836	0.000944147	0.0330226		0.956345	0	0.202011	0.685499	0.562855	0.25129	0.120601	0.13651	0.703372	1.54775	0.233671	0.472935	0.0627868	1.01169	0.941888	4.55502	1.86331	2.23085	0.299295	1.24881	0.139447	0.278219	2.38915
ENSG00000154930	ACSS1	protein_coding	acyl-CoA synthetase short chain family member 1	This gene encodes a mitochondrial acetyl-CoA synthetase enzyme. A similar protein in mice plays an important role in the tricarboxylic acid cycle by catalyzing the conversion of acetate to acetyl CoA. Alternatively spliced transcript variants encoding multiple isoforms have been observed for this gene. [provided by RefSeq, Nov 2011].				hsa00010 (Glycolysis / Gluconeogenesis), hsa00620 (Pyruvate metabolism), hsa00630 (Glyoxylate and dicarboxylate metabolism), hsa00640 (Propanoate metabolism), hsa01100 (Metabolic pathways), hsa01200 (Carbon metabolism), GO:0006069 (ethanol oxidation), GO:0006085 (acetyl-CoA biosynthetic process), GO:0019413 (acetate biosynthetic process), GO:0019427 (acetyl-CoA biosynthetic process from acetate),…	52.2805	86.9183	-0.541634	-0.354589	6.5767	7.02353	0.00906014	0.0313276	0.00635069	0.00682753	0.0625629	0.138786	0.00771196	-0.16749	-0.171996	0.0619031	0.0551146		126.939	93.8979	494.826	351.171	203.512	77.4477	79.2351	79.1756	183.36	63.7764	115.06	112.046	52.3642	93.897	322.754	23.4058	68.2677	108.94	92.4323	87.9401	135.682	293.242	100.485
ENSG00000168291	PDHB	protein_coding	pyruvate dehydrogenase E1 beta subunit	The pyruvate dehydrogenase (PDH) complex is a nuclear-encoded mitochondrial multienzyme complex that catalyzes the overall conversion of pyruvate to acetyl-CoA and carbon dioxide, and provides the primary link between glycolysis and the tricarboxylic acid (TCA) cycle. The PDH complex is composed of multiple copies of three enzymatic components: pyruvate dehydrogenase (E1), dihydrolipoamide acetyl…				hsa00010 (Glycolysis / Gluconeogenesis), hsa00020 (Citrate cycle (TCA cycle)), hsa00620 (Pyruvate metabolism), hsa01100 (Metabolic pathways), hsa01200 (Carbon metabolism), hsa04066 (HIF-1 signaling pathway), hsa04922 (Glucagon signaling pathway), hsa05230 (Central carbon metabolism in cancer), GO:0006006 (glucose metabolic process), GO:0006086 (acetyl-CoA biosynthetic process from pyruvate), GO:0…	51.0128	79.3872	-0.214424	-0.20387	6.01103	5.47712	0.0208146	0.060936	0.0206814	0.0212888	0.0134067	0.0413555	0.00917142	-0.222314	-0.216897	0.0127085	0.0151149		62.2262	56.2404	72.4209	129.07	68.2663	65.9889	55.7982	88.1397	65.7213	70.1495	102.161	57.1857	73.6489	71.4503	42.2953	49.6847	55.9956	57.3514	50.1319	51.6845	80.2749	58.6485	42.7237
ENSG00000137124	ALDH1B1	protein_coding	aldehyde dehydrogenase 1 family member B1	This protein belongs to the aldehyde dehydrogenases family of proteins. Aldehyde dehydrogenase is the second enzyme of the major oxidative pathway of alcohol metabolism. This gene does not contain introns in the coding sequence. The variation of this locus may affect the development of alcohol-related problems. [provided by RefSeq, Jul 2008]. Publication Note: This RefSeq record includes a subset…				hsa00010 (Glycolysis / Gluconeogenesis), hsa00053 (Ascorbate and aldarate metabolism), hsa00071 (Fatty acid degradation), hsa00280 (Valine, leucine and isoleucine degradation), hsa00310 (Lysine degradation), hsa00330 (Arginine and proline metabolism), hsa00340 (Histidine metabolism), hsa00380 (Tryptophan metabolism), hsa00410 (beta-Alanine metabolism), hsa00561 (Glycerolipid metabolism), hsa00620…	49.6291	93.7451	-0.351814	-0.402146	7.35273	4.80888	0.0301218	0.081586	0.0259213	0.0272231	0.00570935	0.0213024	0.0522683	-0.248468	-0.171973	0.00520597	0.0551475		174.437	402.04	197.365	126.524	147.468	237.671	145.284	194.936	160.633	254.423	110.807	148.304	254.538	105.784	109.169	198.739	73.8576	117.584	169.152	121.497	110.86	145.23	305.249
ENSG00000111669	TPI1	protein_coding	triosephosphate isomerase 1	This gene encodes an enzyme, consisting of two identical proteins, which catalyzes the isomerization of glyceraldehydes 3-phosphate (G3P) and dihydroxy-acetone phosphate (DHAP) in glycolysis and gluconeogenesis. Mutations in this gene are associated with triosephosphate isomerase deficiency. Pseudogenes have been identified on chromosomes 1, 4, 6 and 7. Alternative splicing results in multiple tr…				hsa00010 (Glycolysis / Gluconeogenesis), hsa00051 (Fructose and mannose metabolism), hsa00562 (Inositol phosphate metabolism), hsa01100 (Metabolic pathways), hsa01200 (Carbon metabolism), hsa01230 (Biosynthesis of amino acids), GO:0006094 (gluconeogenesis), GO:0006096 (glycolytic process), GO:0006098 (pentose-phosphate shunt), GO:0007275 (multicellular organismal development), GO:0019563 (glycero…	47.024	99.2114	0.317459	0.360754	9.61639	4.67881	0.0323964	0.0862674	0.0283592	0.0273117	0.0102289	0.0334737	0.0375484	0.230864	0.203103	0.00958928	0.0231059		1176.18	1213.89	1071.77	2245.99	1771.71	1162.07	389.02	891.453	628.111	637.582	1068.02	788.816	893.394	841.216	534.589	1032.24	605.928	641.694	488.948	559.062	459.106	647.47	464.62
ENSG00000134333	LDHA	protein_coding	lactate dehydrogenase A	The protein encoded by this gene catalyzes the conversion of L-lactate and NAD to pyruvate and NADH in the final step of anaerobic glycolysis. The protein is found predominantly in muscle tissue and belongs to the lactate dehydrogenase family. Mutations in this gene have been linked to exertional myoglobinuria. Multiple transcript variants encoding different isoforms have been found for this gene…				hsa00010 (Glycolysis / Gluconeogenesis), hsa00270 (Cysteine and methionine metabolism), hsa00620 (Pyruvate metabolism), hsa00640 (Propanoate metabolism), hsa01100 (Metabolic pathways), hsa04066 (HIF-1 signaling pathway), hsa04922 (Glucagon signaling pathway), hsa05230 (Central carbon metabolism in cancer), GO:0001666 (response to hypoxia), GO:0006089 (lactate metabolic process), GO:0006090 (pyruv…	44.6415	99.3619	0.238405	0.240783	9.89672	4.84452	0.0295283	0.0802904	0.0276861	0.0269089	0.0267505	0.0712219	0.0323685	0.199177	0.202256	0.025957	0.0236975		589.81	578.234	561.59	1328.89	1196.23	1139.8	338.568	1511.03	397.625	705	891.877	1262.85	670.94	752.251	585.047	1010.09	856.575	588.014	551.75	612.64	699.326	437.582	622.866
ENSG00000248144	ADH1C	protein_coding	alcohol dehydrogenase 1C (class I), gamma polypeptide	This gene encodes class I alcohol dehydrogenase, gamma subunit, which is a member of the alcohol dehydrogenase family. Members of this enzyme family metabolize a wide variety of substrates, including ethanol, retinol, other aliphatic alcohols, hydroxysteroids, and lipid peroxidation products. Class I alcohol dehydrogenase, consisting of several homo- and heterodimers of alpha, beta, and gamma sub…				hsa00010 (Glycolysis / Gluconeogenesis), hsa00071 (Fatty acid degradation), hsa00350 (Tyrosine metabolism), hsa00830 (Retinol metabolism), hsa00980 (Metabolism of xenobiotics by cytochrome P450), hsa00982 (Drug metabolism - cytochrome P450), hsa01100 (Metabolic pathways), hsa05204 (Chemical carcinogenesis), GO:0006069 (ethanol oxidation), GO:0005654 (nucleoplasm), GO:0005829 (cytosol), GO:0005886…	44.4012	58.9489	-0.765389	-0.89072	4.88146	3.68724	0.0570564	0.133263	0.0365456	0.0407583	0.00224663	0.010136	0.0501382	-0.274646	-0.159524	0.00193768	0.0755661		143.069	64.2045	5.45429	174.9	9.80976	36.7387	5.42706	10.1472	14.1554	16.479	37.2005	2.83761	15.32	24.0907	8.92551	19.061	16.2236	0.883044	5.53696	8.01653	0.929646	19.1414	65.4909
ENSG00000006534	ALDH3B1	protein_coding	aldehyde dehydrogenase 3 family member B1	This gene encodes a member of the aldehyde dehydrogenase protein family. Aldehyde dehydrogenases are a family of isozymes that may play a major role in the detoxification of aldehydes generated by alcohol metabolism and lipid peroxidation. The encoded protein is able to oxidize long-chain fatty aldehydes in vitro, and may play a role in protection from oxidative stress. Alternative splicing resul…				hsa00010 (Glycolysis / Gluconeogenesis), hsa00340 (Histidine metabolism), hsa00350 (Tyrosine metabolism), hsa00360 (Phenylalanine metabolism), hsa00410 (beta-Alanine metabolism), hsa00980 (Metabolism of xenobiotics by cytochrome P450), hsa00982 (Drug metabolism - cytochrome P450), hsa01100 (Metabolic pathways), hsa05204 (Chemical carcinogenesis), GO:0006066 (alcohol metabolic process), GO:0006068…	41.6147	66.9195	0.417599	0.407381	5.3134	5.50803	0.0204651	0.0600717	0.0161356	0.0154066	0.102543	0.201364	0.0669317	0.146868	0.202778	0.102173	0.0233311		50.4313	92.1281	57.4721	45.145	51.1394	37.7941	56.4414	19.5209	67.3479	14.3395	34.0693	27.0755	32.0841	42.0482	42.8335	24.1066	39.0009	26.9561	17.7582	22.5591	51.084	31.1048	19.3943
ENSG00000111275	ALDH2	protein_coding	aldehyde dehydrogenase 2 family (mitochondrial)	This protein belongs to the aldehyde dehydrogenase family of proteins. Aldehyde dehydrogenase is the second enzyme of the major oxidative pathway of alcohol metabolism. Two major liver isoforms of aldehyde dehydrogenase, cytosolic and mitochondrial, can be distinguished by their electrophoretic mobilities, kinetic properties, and subcellular localizations. Most Caucasians have two major isozymes,…				hsa00010 (Glycolysis / Gluconeogenesis), hsa00053 (Ascorbate and aldarate metabolism), hsa00071 (Fatty acid degradation), hsa00280 (Valine, leucine and isoleucine degradation), hsa00310 (Lysine degradation), hsa00330 (Arginine and proline metabolism), hsa00340 (Histidine metabolism), hsa00380 (Tryptophan metabolism), hsa00410 (beta-Alanine metabolism), hsa00561 (Glycerolipid metabolism), hsa00620…	39.958	96.6227	-0.236392	-0.283177	7.98189	3.63281	0.0588947	0.136618	0.055434	0.0572838	0.0118162	0.0375273	0.0775422	-0.226337	-0.168256	0.0111445	0.0607024		485.377	361.925	298.673	403.661	575.721	496.55	339.935	274.885	362.325	287.745	246.336	247.739	286.559	271.89	216.679	433.988	367.232	285.316	252.455	228.209	98.7749	225.246	187.338
ENSG00000107789	MINPP1	protein_coding	multiple inositol-polyphosphate phosphatase 1	This gene encodes multiple inositol polyphosphate phosphatase; an enzyme that removes 3-phosphate from inositol phosphate substrates. It is the only enzyme known to hydrolzye inositol pentakisphosphate and inositol hexakisphosphate. This enzyme also converts 2,3 bisphosphoglycerate (2,3-BPG) to 2-phosphoglycerate; an activity formerly thought to be exclusive to 2,3-BPG synthase/2-phosphatase (BPG…				hsa00010 (Glycolysis / Gluconeogenesis), hsa00562 (Inositol phosphate metabolism), hsa01100 (Metabolic pathways), GO:0001503 (ossification), GO:0006797 (polyphosphate metabolic process), GO:0016311 (dephosphorylation), GO:0030282 (bone mineralization), GO:0043647 (inositol phosphate metabolic process), GO:0005783 (endoplasmic reticulum), GO:0005788 (endoplasmic reticulum lumen), GO:0070062 (extra…	38.0114	58.6539	0.262502	0.19293	4.86599	4.83261	0.0297253	0.0807204	0.0277184	0.0269082	0.107344	0.208257	0.0740364	0.144856	0.201071	0.10701	0.0245459		39.5289	34.2162	22.6252	16.6478	5.54815	20.3043	22.9545	10.9208	15.9578	31.1826	27.433	28.1002	57.136	26.3038	24.1303	30.2734	42.8882	23.1915	20.3022	27.7154	34.2574	13.9666	20.7997
ENSG00000124253	PCK1	protein_coding	phosphoenolpyruvate carboxykinase 1	This gene is a main control point for the regulation of gluconeogenesis. The cytosolic enzyme encoded by this gene, along with GTP, catalyzes the formation of phosphoenolpyruvate from oxaloacetate, with the release of carbon dioxide and GDP. The expression of this gene can be regulated by insulin, glucocorticoids, glucagon, cAMP, and diet. Defects in this gene are a cause of cytosolic phosphoenol…				hsa00010 (Glycolysis / Gluconeogenesis), hsa00020 (Citrate cycle (TCA cycle)), hsa00620 (Pyruvate metabolism), hsa01100 (Metabolic pathways), hsa03320 (PPAR signaling pathway), hsa04068 (FoxO signaling pathway), hsa04151 (PI3K-Akt signaling pathway), hsa04152 (AMPK signaling pathway), hsa04910 (Insulin signaling pathway), hsa04920 (Adipocytokine signaling pathway), hsa04922 (Glucagon signaling pa…	37.5661	72.5122	-0.582326	-1.11973	5.61067	2.53432	0.113863	0.224629	0.0853192	0.0930087	0.000886952	0.00482773	0.328546	-0.298767	-0.0935479	0.000713333	0.299425		21.5496	203.724	56.159	70.8023	135.166	47.896	64.4011	8.19058	13.1443	5.69026	37.7613	47.2541	53.6199	27.2523	80.7781	86.8257	7.38897	43.6874	34.1196	14.6634	45.878	27.2098	153.749
ENSG00000149925	ALDOA	protein_coding	aldolase, fructose-bisphosphate A	The protein encoded by this gene, Aldolase A (fructose-bisphosphate aldolase), is a glycolytic enzyme that catalyzes the reversible conversion of fructose-1,6-bisphosphate to glyceraldehyde 3-phosphate and dihydroxyacetone phosphate. Three aldolase isozymes (A, B, and C), encoded by three different genes, are differentially expressed during development. Aldolase A is found in the developing embry…				hsa00010 (Glycolysis / Gluconeogenesis), hsa00030 (Pentose phosphate pathway), hsa00051 (Fructose and mannose metabolism), hsa01100 (Metabolic pathways), hsa01200 (Carbon metabolism), hsa01230 (Biosynthesis of amino acids), hsa04066 (HIF-1 signaling pathway), GO:0002576 (platelet degranulation), GO:0006000 (fructose metabolic process), GO:0006094 (gluconeogenesis), GO:0006096 (glycolytic process)…	32.4797	99.7773	0.277096	0.309341	10.8709	2.82554	0.095216	0.197088	0.0855841	0.0826033	0.0271372	0.0720091	0.112152	0.198674	0.155968	0.0263431	0.0824042		3369.78	2702.29	2039.2	3262.09	6899.48	3493.44	783.507	1855.03	1728.67	883.128	1297.62	1869.31	2775.81	2310.69	1202.21	2109.67	1132.83	1528.5	1553.54	1074.17	1480.14	1183.43	888.905
ENSG00000141349	G6PC3	protein_coding	glucose-6-phosphatase catalytic subunit 3	This gene encodes the catalytic subunit of glucose-6-phosphatase (G6Pase). G6Pase is located in the endoplasmic reticulum (ER) and catalyzes the hydrolysis of glucose-6-phosphate to glucose and phosphate in the last step of the gluconeogenic and glycogenolytic pathways. Mutations in this gene result in autosomal recessive severe congenital neutropenia. Multiple transcript variants have been found…				hsa00010 (Glycolysis / Gluconeogenesis), hsa00052 (Galactose metabolism), hsa00500 (Starch and sucrose metabolism), hsa01100 (Metabolic pathways), hsa04068 (FoxO signaling pathway), hsa04151 (PI3K-Akt signaling pathway), hsa04152 (AMPK signaling pathway), hsa04910 (Insulin signaling pathway), hsa04920 (Adipocytokine signaling pathway), hsa04922 (Glucagon signaling pathway), hsa04931 (Insulin resi…	32.3519	83.7578	-0.272168	-0.217116	6.31767	3.53018	0.0625371	0.14281	0.0577327	0.0600874	0.0881085	0.179491	0.0405524	-0.153406	-0.16257	0.0876307	0.0700801		214.094	231.451	147.771	234.93	221.363	125.645	47.3963	32.9443	93.6364	47.8892	81.5513	112.756	111.195	76.5719	47.9017	111.353	74.468	100.992	106.699	81.5349	71.9081	77.5117	42.021
ENSG00000196616	ADH1B	protein_coding	alcohol dehydrogenase 1B (class I), beta polypeptide	The protein encoded by this gene is a member of the alcohol dehydrogenase family. Members of this enzyme family metabolize a wide variety of substrates, including ethanol, retinol, other aliphatic alcohols, hydroxysteroids, and lipid peroxidation products. This encoded protein, consisting of several homo- and heterodimers of alpha, beta, and gamma subunits, exhibits high activity for ethanol oxid…				hsa00010 (Glycolysis / Gluconeogenesis), hsa00071 (Fatty acid degradation), hsa00350 (Tyrosine metabolism), hsa00830 (Retinol metabolism), hsa00980 (Metabolism of xenobiotics by cytochrome P450), hsa00982 (Drug metabolism - cytochrome P450), hsa01100 (Metabolic pathways), hsa05204 (Chemical carcinogenesis), GO:0006069 (ethanol oxidation), GO:0005654 (nucleoplasm), GO:0005829 (cytosol), GO:0005886…	28.6429	25.14	-0.754536	-0.424324	2.26557	3.21791	0.0751986	0.164036	0.0563026	0.0608456	0.137247	0.251246	0.0488589	-0.133711	-0.130894	0.137121	0.145667		5.22802	7.17754	3.6362	0.783428	0	0.301549	8.6431	0.273019	5.36321	8.96785	3.03773	0.0788225	1.06738	2.97182	1.61467	6.51718	5.26866	0.278856	0.448942	0.241704	3.1608	3.33862	0.281077
ENSG00000108515	ENO3	protein_coding	enolase 3	This gene encodes one of the three enolase isoenzymes found in mammals. This isoenzyme is found in skeletal muscle cells in the adult where it may play a role in muscle development and regeneration. A switch from alpha enolase to beta enolase occurs in muscle tissue during development in rodents. Mutations in this gene have be associated glycogen storage disease. Alternatively spliced transcript …				hsa00010 (Glycolysis / Gluconeogenesis), hsa01100 (Metabolic pathways), hsa01200 (Carbon metabolism), hsa01230 (Biosynthesis of amino acids), hsa03018 (RNA degradation), hsa04066 (HIF-1 signaling pathway), GO:0006094 (gluconeogenesis), GO:0007568 (aging), GO:0042493 (response to drug), GO:0043403 (skeletal muscle tissue regeneration), GO:0061621 (canonical glycolysis), GO:0000015 (phosphopyruvate…	28.3293	26.055	0.295676	0.269304	2.35204	3.07182	0.0820561	0.175437	0.0768111	0.0741895	0.125563	0.235118	0.161622	0.137814	0.147424	0.125361	0.100866		11.9862	10.0289	7.17139	5.48399	19.0567	3.01549	4.46225	7.18951	11.4738	5.28056	4.57996	3.42878	10.4226	3.60413	8.5667	4.13456	5.26866	3.20684	3.94072	3.38386	6.8329	3.33862	5.19992
ENSG00000172955	ADH6	protein_coding	alcohol dehydrogenase 6 (class V)	This gene encodes class V alcohol dehydrogenase, which is a member of the alcohol dehydrogenase family. Members of this family metabolize a wide variety of substrates, including ethanol, retinol, other aliphatic alcohols, hydroxysteroids, and lipid peroxidation products. This gene is expressed in the stomach as well as in the liver, and it contains a glucocorticoid response element upstream of it…				hsa00010 (Glycolysis / Gluconeogenesis), hsa00071 (Fatty acid degradation), hsa00350 (Tyrosine metabolism), hsa00830 (Retinol metabolism), hsa00980 (Metabolism of xenobiotics by cytochrome P450), hsa00982 (Drug metabolism - cytochrome P450), hsa01100 (Metabolic pathways), hsa05204 (Chemical carcinogenesis), GO:0006069 (ethanol oxidation), GO:0045471 (response to ethanol), GO:0005829 (cytosol), GO…	25.7925	33.6343	-0.415064	-0.346333	3.08208	2.21583	0.139063	0.261457	0.117291	0.124696	0.0717497	0.154252	0.129123	-0.161959	-0.122848	0.0711525	0.172298		32.197	2.26142	4.34323	5.28814	2.97509	6.08123	2.85423	3.82227	2.242	11.5171	5.98199	11.1534	13.1852	5.81719	25.7001	32.0954	22.3918	5.57712	0.648472	6.44545	0.371858	5.11922	14.7565
ENSG00000172331	BPGM	protein_coding	bisphosphoglycerate mutase	2,3-diphosphoglycerate (2,3-DPG) is a small molecule found at high concentrations in red blood cells where it binds to and decreases the oxygen affinity of hemoglobin. This gene encodes a multifunctional enzyme that catalyzes 2,3-DPG synthesis via its synthetase activity, and 2,3-DPG degradation via its phosphatase activity. The enzyme also has phosphoglycerate phosphomutase activity. Deficiency …				hsa00010 (Glycolysis / Gluconeogenesis), hsa00260 (Glycine, serine and threonine metabolism), hsa01100 (Metabolic pathways), GO:0005975 (carbohydrate metabolic process), GO:0006006 (glucose metabolic process), GO:0006094 (gluconeogenesis), GO:0006096 (glycolytic process), GO:0007585 (respiratory gaseous exchange), GO:0043456 (regulation of pentose-phosphate shunt), GO:0005829 (cytosol), GO:007006…	24.7858	37.0538	0.201095	0.155261	3.39628	3.41524	0.0669067	0.150431	0.0647497	0.0667292	0.298824	0.442561	0.136618	0.0935528	0.169477	0.2994	0.0588295		3.82538	4.22786	4.44424	7.73635	5.22651	7.23717	10.7335	6.00642	7.38541	8.78576	9.9544	7.64578	3.64164	14.4797	7.17629	8.54942	6.81071	4.78703	6.78402	10.3933	7.85551	9.40379	8.57284
ENSG00000159322	ADPGK	protein_coding	ADP dependent glucokinase	ADPGK (EC 2.7.1.147) catalyzes the ADP-dependent phosphorylation of glucose to glucose-6-phosphate and may play a role in glycolysis, possibly during ischemic conditions (Ronimus and Morgan, 2004 [PubMed 14975750]).[supplied by OMIM, Mar 2008].				hsa00010 (Glycolysis / Gluconeogenesis), hsa01100 (Metabolic pathways), hsa01200 (Carbon metabolism), GO:0006006 (glucose metabolic process), GO:0006096 (glycolytic process), GO:0005576 (extracellular region), GO:0005783 (endoplasmic reticulum), GO:0016020 (membrane), GO:0043843 (ADP-specific glucokinase activity), GO:0046872 (metal ion binding), R-HSA-1430728 (Homo sapiens: Metabolism), R-HSA-70…	24.5114	77.1236	0.125524	0.108034	5.87642	2.54276	0.113269	0.223855	0.116317	0.116156	0.158949	0.280644	0.160305	0.126749	0.14641	0.158969	0.103258		28.6904	24.1873	39.9982	55.0358	50.2549	44.0764	49.7682	65.2061	33.3223	69.4667	56.455	54.7816	56.6965	71.3238	84.9493	59.3554	62.7741	44.7099	56.0679	57.2437	41.0903	47.5754	53.5451
ENSG00000169299	PGM2	protein_coding	phosphoglucomutase 2					hsa00010 (Glycolysis / Gluconeogenesis), hsa00030 (Pentose phosphate pathway), hsa00052 (Galactose metabolism), hsa00230 (Purine metabolism), hsa00500 (Starch and sucrose metabolism), hsa00520 (Amino sugar and nucleotide sugar metabolism), hsa01100 (Metabolic pathways), GO:0005978 (glycogen biosynthetic process), GO:0005980 (glycogen catabolic process), GO:0006006 (glucose metabolic process), GO:…	22.9422	65.0111	0.170026	0.154071	5.21135	2.24835	0.136221	0.257513	0.133823	0.131434	0.160612	0.282381	0.145545	0.126246	0.141583	0.160643	0.115259		16.9592	15.5349	20.2011	33.6874	7.39753	39.1008	28.9845	24.7082	19.079	42.6087	56.7822	45.0864	20.1546	21.8777	24.0406	41.1353	41.6353	39.5511	32.9723	43.0637	27.471	27.7106	23.6104
ENSG00000100889	PCK2	protein_coding	phosphoenolpyruvate carboxykinase 2, mitochondrial	This gene encodes a mitochondrial enzyme that catalyzes the conversion of oxaloacetate to phosphoenolpyruvate in the presence of guanosine triphosphate (GTP). A cytosolic form of this protein is encoded by a different gene and is the key enzyme of gluconeogenesis in the liver. Alternatively spliced transcript variants have been described. [provided by RefSeq, Apr 2014].				hsa00010 (Glycolysis / Gluconeogenesis), hsa00020 (Citrate cycle (TCA cycle)), hsa00620 (Pyruvate metabolism), hsa01100 (Metabolic pathways), hsa03320 (PPAR signaling pathway), hsa04068 (FoxO signaling pathway), hsa04151 (PI3K-Akt signaling pathway), hsa04152 (AMPK signaling pathway), hsa04910 (Insulin signaling pathway), hsa04920 (Adipocytokine signaling pathway), hsa04922 (Glucagon signaling pa…	19.7625	89.23	-0.248029	-0.164363	6.80314	2.44134	0.120646	0.234886	0.112612	0.116797	0.339605	0.484304	0.106847	-0.0860082	-0.124341	0.340231	0.167101		451.331	211.59	166.861	401.702	148.353	302.453	71.0342	131.322	82.2945	89.2233	222.642	189.134	146.67	127.219	68.6681	88.8579	70.3237	90.8141	96.9217	88.1415	125.921	74.1731	66.6152
ENSG00000156510	HKDC1	protein_coding	hexokinase domain containing 1					hsa00010 (Glycolysis / Gluconeogenesis), hsa00051 (Fructose and mannose metabolism), hsa00052 (Galactose metabolism), hsa00500 (Starch and sucrose metabolism), hsa00520 (Amino sugar and nucleotide sugar metabolism), hsa00524 (Neomycin, kanamycin and gentamicin biosynthesis), hsa01100 (Metabolic pathways), hsa01200 (Carbon metabolism), hsa04066 (HIF-1 signaling pathway), hsa04910 (Insulin signalin…	19.4103	83.6072	-0.244501	-0.207453	6.30563	1.93403	0.166733	0.298428	0.1549	0.160802	0.242896	0.381068	0.124349	-0.105121	-0.127198	0.243324	0.157485		147.341	152.498	158.983	40.9341	242.028	181.683	109.225	79.9946	58.6436	75.2025	87.2997	115.12	142.463	64.4317	251.215	137.351	100.394	113.68	170.249	100.992	12.9221	91.9791	103.436
ENSG00000197894	ADH5	protein_coding	alcohol dehydrogenase 5 (class III), chi polypeptide	This gene encodes a member of the alcohol dehydrogenase family. Members of this family metabolize a wide variety of substrates, including ethanol, retinol, other aliphatic alcohols, hydroxysteroids, and lipid peroxidation products. The encoded protein forms a homodimer. It has virtually no activity for ethanol oxidation, but exhibits high activity for oxidation of long-chain primary alcohols and …				hsa00010 (Glycolysis / Gluconeogenesis), hsa00071 (Fatty acid degradation), hsa00350 (Tyrosine metabolism), hsa00830 (Retinol metabolism), hsa00980 (Metabolism of xenobiotics by cytochrome P450), hsa00982 (Drug metabolism - cytochrome P450), hsa01100 (Metabolic pathways), hsa01200 (Carbon metabolism), hsa05204 (Chemical carcinogenesis), GO:0001523 (retinoid metabolic process), GO:0003016 (respira…	16.6706	93.0046	-0.135847	-0.206206	7.2395	1.22649	0.270169	0.423535	0.266122	0.272015	0.189048	0.317103	0.384367	-0.118198	-0.0894205	0.189241	0.321346		225.251	149.548	138.175	349.8	169.419	114.94	88.7626	107.797	75.8763	161.74	185.348	163.714	176.494	171.164	109.349	201.402	131.749	107.964	101.411	118.516	106.073	90.4211	118.755
ENSG00000150768	DLAT	protein_coding	dihydrolipoamide S-acetyltransferase	This gene encodes component E2 of the multi-enzyme pyruvate dehydrogenase complex (PDC). PDC resides in the inner mitochondrial membrane and catalyzes the conversion of pyruvate to acetyl coenzyme A. The protein product of this gene, dihydrolipoamide acetyltransferase, accepts acetyl groups formed by the oxidative decarboxylation of pyruvate and transfers them to coenzyme A. Dihydrolipoamide acet…				hsa00010 (Glycolysis / Gluconeogenesis), hsa00020 (Citrate cycle (TCA cycle)), hsa00620 (Pyruvate metabolism), hsa01100 (Metabolic pathways), hsa01200 (Carbon metabolism), GO:0006006 (glucose metabolic process), GO:0006086 (acetyl-CoA biosynthetic process from pyruvate), GO:0006090 (pyruvate metabolic process), GO:0006099 (tricarboxylic acid cycle), GO:0010510 (regulation of acetyl-CoA biosynthet…	15.5482	78.3758	-0.136708	-0.111616	5.94922	1.45104	0.230585	0.377923	0.229094	0.234153	0.325632	0.470559	0.225469	-0.088523	-0.106289	0.326246	0.238097		31.3681	26.5471	33.3318	51.4124	19.1371	67.1951	49.3662	44.8662	44.4443	64.0951	66.7366	59.038	45.646	50.0784	37.6307	54.3799	55.8349	70.8294	67.092	50.9996	52.3391	41.5659	39.4913
ENSG00000184254	ALDH1A3	protein_coding	aldehyde dehydrogenase 1 family member A3	This gene encodes an aldehyde dehydrogenase enzyme that uses retinal as a substrate. Mutations in this gene have been associated with microphthalmia, isolated 8, and expression changes have also been detected in tumor cells. Alternative splicing results in multiple transcript variants. [provided by RefSeq, Jun 2014].				hsa00010 (Glycolysis / Gluconeogenesis), hsa00340 (Histidine metabolism), hsa00350 (Tyrosine metabolism), hsa00360 (Phenylalanine metabolism), hsa00410 (beta-Alanine metabolism), hsa00980 (Metabolism of xenobiotics by cytochrome P450), hsa00982 (Drug metabolism - cytochrome P450), hsa01100 (Metabolic pathways), hsa05204 (Chemical carcinogenesis), GO:0002072 (optic cup morphogenesis involved in ca…	13.6766	35.94	-0.14356	-0.19265	3.29295	0.647146	0.422627	0.577277	0.413875	0.423994	0.138493	0.252831	0.481893	-0.133288	-0.0687651	0.13838	0.446063		18.043	12.6836	11.4136	3.4275	3.45754	1.70878	13.9898	10.1017	6.15451	8.78576	5.51465	1.69468	4.08114	18.5265	10.0468	5.39595	7.19622	2.09142	2.69365	4.95494	14.0377	10.7392	9.69715
ENSG00000143149	ALDH9A1	protein_coding	aldehyde dehydrogenase 9 family member A1	This protein belongs to the aldehyde dehydrogenase family of proteins. It has a high activity for oxidation of gamma-aminobutyraldehyde and other amino aldehydes. The enzyme catalyzes the dehydrogenation of gamma-aminobutyraldehyde to gamma-aminobutyric acid (GABA). This isozyme is a tetramer of identical 54-kD subunits. [provided by RefSeq, Jul 2008]. Publication Note: This RefSeq record include…				hsa00010 (Glycolysis / Gluconeogenesis), hsa00053 (Ascorbate and aldarate metabolism), hsa00071 (Fatty acid degradation), hsa00280 (Valine, leucine and isoleucine degradation), hsa00310 (Lysine degradation), hsa00330 (Arginine and proline metabolism), hsa00340 (Histidine metabolism), hsa00380 (Tryptophan metabolism), hsa00410 (beta-Alanine metabolism), hsa00561 (Glycerolipid metabolism), hsa00620…	13.2686	84.8895	0.112551	0.102959	6.40747	1.24442	0.266712	0.419541	0.267776	0.263897	0.411917	0.555385	0.355972	0.0739369	0.0951737	0.412526	0.291067		61.3974	45.3266	38.8871	88.2335	40.0431	63.878	65.6875	103.019	104.143	64.7779	74.9618	82.9606	55.6291	125.133	81.8994	91.8012	91.7518	70.4576	56.3672	53.9001	127.594	83.5769	71.3935
ENSG00000136872	ALDOB	protein_coding	aldolase, fructose-bisphosphate B	Fructose-1,6-bisphosphate aldolase (EC 4.1.2.13) is a tetrameric glycolytic enzyme that catalyzes the reversible conversion of fructose-1,6-bisphosphate to glyceraldehyde 3-phosphate and dihydroxyacetone phosphate. Vertebrates have 3 aldolase isozymes which are distinguished by their electrophoretic and catalytic properties. Differences indicate that aldolases A, B, and C are distinct proteins, t…				hsa00010 (Glycolysis / Gluconeogenesis), hsa00030 (Pentose phosphate pathway), hsa00051 (Fructose and mannose metabolism), hsa01100 (Metabolic pathways), hsa01200 (Carbon metabolism), hsa01230 (Biosynthesis of amino acids), GO:0006000 (fructose metabolic process), GO:0006094 (gluconeogenesis), GO:0006096 (glycolytic process), GO:0006116 (NADH oxidation), GO:0030388 (fructose 1,6-bisphosphate meta…	13.1352	70.7724	0.452868	0.307623	5.51641	1.56752	0.212851	0.355702	0.173083	0.163055	0.514076	0.647216	0.375274	0.0588481	0.0955432	0.514468	0.28919		3.18782	125.951	10.5046	7.54049	13.3477	3.16626	1.08541	9.00964	8.88007	11.7902	31.125	19.9815	14.6293	87.2578	378.729	130.414	42.342	12.6415	14.1167	7.61369	0.976128	54.6978	15.4592
ENSG00000091140	DLD	protein_coding	dihydrolipoamide dehydrogenase	This gene encodes a member of the class-I pyridine nucleotide-disulfide oxidoreductase family. The encoded protein has been identified as a moonlighting protein based on its ability to perform mechanistically distinct functions. In homodimeric form, the encoded protein functions as a dehydrogenase and is found in several multi-enzyme complexes that regulate energy metabolism. However, as a monome…				hsa00010 (Glycolysis / Gluconeogenesis), hsa00020 (Citrate cycle (TCA cycle)), hsa00260 (Glycine, serine and threonine metabolism), hsa00280 (Valine, leucine and isoleucine degradation), hsa00620 (Pyruvate metabolism), hsa00630 (Glyoxylate and dicarboxylate metabolism), hsa00640 (Propanoate metabolism), hsa01100 (Metabolic pathways), hsa01200 (Carbon metabolism), GO:0006090 (pyruvate metabolic pr…	9.36249	88.6641	-0.0744345	-0.0613358	6.74211	0.655459	0.419671	0.574829	0.423553	0.42955	0.492647	0.628088	0.45014	-0.0618655	-0.0723499	0.493101	0.422656		51.5151	52.0126	61.9163	85.7853	65.6933	84.1321	97.0841	119.946	117.199	112.986	99.544	112.007	84.2599	137.779	83.9626	104.065	81.1823	107.127	98.4182	63.246	68.8403	83.5769	123.674
ENSG00000132746	ALDH3B2	protein_coding	aldehyde dehydrogenase 3 family member B2	This gene encodes a member of the aldehyde dehydrogenase family, a group of isozymes that may play a major role in the detoxification of aldehydes generated by alcohol metabolism and lipid peroxidation. The gene of this particular family member is over 10 kb in length. The expression of these transcripts is restricted to the salivary gland among the human tissues examined. Alternate transcription…				hsa00010 (Glycolysis / Gluconeogenesis), hsa00340 (Histidine metabolism), hsa00350 (Tyrosine metabolism), hsa00360 (Phenylalanine metabolism), hsa00410 (beta-Alanine metabolism), hsa00980 (Metabolism of xenobiotics by cytochrome P450), hsa00982 (Drug metabolism - cytochrome P450), hsa01100 (Metabolic pathways), hsa05204 (Chemical carcinogenesis), GO:0006066 (alcohol metabolic process), GO:0006068…	7.44608	17.7352	-0.338248	-0.136328	1.4898	0.757704	0.385679	0.543702	0.354072	0.379091	0.698582	0.797153	0.408148	-0.0350285	-0.0606663	0.698153	0.501536		3.57036	1.08155	2.42413	5.19021	1.28653	0.502581	2.93463	0.227516	10.0231	0.637309	14.0203	1.49763	1.00459	0.126461	0.0448518	0.490541	21.2995	5.57712	0.39906	0.966817	0.511305	0.723368	0
ENSG00000079739	PGM1	protein_coding	phosphoglucomutase 1	The protein encoded by this gene is an isozyme of phosphoglucomutase (PGM) and belongs to the phosphohexose mutase family. There are several PGM isozymes, which are encoded by different genes and catalyze the transfer of phosphate between the 1 and 6 positions of glucose. In most cell types, this PGM isozyme is predominant, representing about 90% of total PGM activity. In red cells, PGM2 is a maj…				hsa00010 (Glycolysis / Gluconeogenesis), hsa00030 (Pentose phosphate pathway), hsa00052 (Galactose metabolism), hsa00230 (Purine metabolism), hsa00500 (Starch and sucrose metabolism), hsa00520 (Amino sugar and nucleotide sugar metabolism), hsa01100 (Metabolic pathways), GO:0005978 (glycogen biosynthetic process), GO:0005980 (glycogen catabolic process), GO:0006006 (glucose metabolic process), GO:…	7.30583	84.9618	-0.096429	-0.0744544	6.41044	0.398423	0.529031	0.672308	0.522458	0.533588	0.550847	0.6797	0.519448	-0.053818	-0.0570261	0.551115	0.527595		146.512	123.493	84.7436	72.1733	68.7488	190.78	101.948	73.6697	62.1165	50.484	64.8672	40.0418	72.6444	129.685	44.9864	75.7535	100.265	90.3958	86.6958	63.0848	35.0476	56.2002	89.5229
ENSG00000111716	LDHB	protein_coding	lactate dehydrogenase B	This gene encodes an enzyme which catalyzes the reversible conversion of lactate and pyruvate, and NAD and NADH, in the glycolytic pathway. Mutations in this gene are associated with lactate dehydrogenase B deficiency. Pseudogenes have been identified on the X chromosome and on chromosome. Multiple alternatively spliced variants, encoding the same protein, have been identified. [provided by RefSe…				hsa00010 (Glycolysis / Gluconeogenesis), hsa00270 (Cysteine and methionine metabolism), hsa00620 (Pyruvate metabolism), hsa00640 (Propanoate metabolism), hsa01100 (Metabolic pathways), hsa04922 (Glucagon signaling pathway), GO:0005975 (carbohydrate metabolic process), GO:0006089 (lactate metabolic process), GO:0006090 (pyruvate metabolic process), GO:0019674 (NAD metabolic process), GO:0055114 (o…	5.45746	98.1518	0.0902983	0.0691093	8.6163	0.216242	0.642709	0.763088	0.632083	0.617803	0.620123	0.737471	0.621691	0.0447645	0.0496518	0.620104	0.582398		192.225	317.778	328.874	692.648	185.662	734.673	69.2654	639.32	354.28	729.765	1189.06	618.047	482.328	199.555	233.229	371.62	277.89	575.838	498.376	469.47	325.655	594.72	356.124
ENSG00000109107	ALDOC	protein_coding	aldolase, fructose-bisphosphate C	This gene encodes a member of the class I fructose-biphosphate aldolase gene family. Expressed specifically in the hippocampus and Purkinje cells of the brain, the encoded protein is a glycolytic enzyme that catalyzes the reversible aldol cleavage of fructose-1,6-biphosphate and fructose 1-phosphate to dihydroxyacetone phosphate and either glyceraldehyde-3-phosphate or glyceraldehyde, respectivel…				hsa00010 (Glycolysis / Gluconeogenesis), hsa00030 (Pentose phosphate pathway), hsa00051 (Fructose and mannose metabolism), hsa01100 (Metabolic pathways), hsa01200 (Carbon metabolism), hsa01230 (Biosynthesis of amino acids), GO:0006000 (fructose metabolic process), GO:0006094 (gluconeogenesis), GO:0030388 (fructose 1,6-bisphosphate metabolic process), GO:0030855 (epithelial cell differentiation), …	3.48075	71.1155	0.0569692	-0.0325251	5.5358	0.0658307	0.797919	0.874347	0.78881	0.770905	0.684697	0.786876	0.836611	-0.0367169	0.0206714	0.68436	0.819012		115.59	113.464	72.6229	77.7552	92.2279	248.174	42.2909	20.1579	27.2117	8.74024	54.2118	66.9203	80.3671	81.1877	24.9825	40.2944	25.4116	21.1931	19.4542	32.3481	34.4434	28.4896	22.9078
ENSG00000143891	GALM	protein_coding	galactose mutarotase	This gene encodes an enzyme that catalyzes the epimerization of hexose sugars such as glucose and galactose. The encoded protein is expressed in the cytoplasm and has a preference for galactose. The encoded protein may be required for normal galactose metabolism by maintaining the equilibrium of alpha and beta anomers of galactose.[provided by RefSeq, Mar 2009].				hsa00010 (Glycolysis / Gluconeogenesis), hsa00052 (Galactose metabolism), hsa01100 (Metabolic pathways), GO:0006006 (glucose metabolic process), GO:0006012 (galactose metabolic process), GO:0033499 (galactose catabolic process via UDP-galactose), GO:0005737 (cytoplasm), GO:0070062 (extracellular vesicular exosome), GO:0004034 (aldose 1-epimerase activity), GO:0030246 (carbohydrate binding)	3.46711	70.8868	-0.0170217	-0.0379164	5.52106	0.0201618	0.887309	0.931028	0.887927	0.896744	0.44123	0.582243	0.902285	-0.0694101	-0.0128921	0.441798	0.88653		43.3543	32.0531	30.4026	89.6045	85.3932	36.6382	24.6429	45.0482	36.8391	32.4572	40.9392	45.4017	44.3903	44.0083	34.7153	55.8515	38.776	38.2497	39.7065	48.8243	19.1507	33.6088	40.194
ENSG00000102144	PGK1	protein_coding	phosphoglycerate kinase 1	The protein encoded by this gene is a glycolytic enzyme that catalyzes the conversion of 1,3-diphosphoglycerate to 3-phosphoglycerate. The encoded protein may also act as a cofactor for polymerase alpha. Additionally, this protein is secreted by tumor cells where it participates in angiogenesis by functioning to reduce disulfide bonds in the serine protease, plasmin, which consequently leads to t…				hsa00010 (Glycolysis / Gluconeogenesis), hsa01100 (Metabolic pathways), hsa01200 (Carbon metabolism), hsa01230 (Biosynthesis of amino acids), hsa04066 (HIF-1 signaling pathway), GO:0006094 (gluconeogenesis), GO:0006096 (glycolytic process), GO:0016310 (phosphorylation), GO:0016525 (negative regulation of angiogenesis), GO:0030855 (epithelial cell differentiation), GO:0031639 (plasminogen activati…	1.98809	99.1632	-0.00819058	0.0297201	9.54166	0.00451816	0.946514	0.969381	0.946043	0.95665	0.581165	0.70594	0.938358	0.0497942	-0.00606735	0.581315	0.946459		472.498	798.476	569.671	1204.62	756.236	640.137	290.689	443.201	519.352	494.871	714.754	1129.05	976.147	483.016	595.542	1561.18	766.847	549.95	632.41	710.933	623.56	381.104	389.151
ENSG00000152556	PFKM	protein_coding	phosphofructokinase, muscle	Three phosphofructokinase isozymes exist in humans: muscle, liver and platelet. These isozymes function as subunits of the mammalian tetramer phosphofructokinase, which catalyzes the phosphorylation of fructose-6-phosphate to fructose-1,6-bisphosphate. Tetramer composition varies depending on tissue type. This gene encodes the muscle-type isozyme. Mutations in this gene have been associated with …				hsa00010 (Glycolysis / Gluconeogenesis), hsa00030 (Pentose phosphate pathway), hsa00051 (Fructose and mannose metabolism), hsa00052 (Galactose metabolism), hsa01100 (Metabolic pathways), hsa01200 (Carbon metabolism), hsa01230 (Biosynthesis of amino acids), hsa03018 (RNA degradation), hsa04152 (AMPK signaling pathway), hsa05230 (Central carbon metabolism in cancer), GO:0005980 (glycogen catabolic …	1.17175	79.5557	0.0216396	0.0554948	6.02441	0.028903	0.865272	0.917115	0.865147	0.852734	0.944185	0.965042	0.878424	-0.00653863	0.0158667	0.942307	0.86059		98.8861	70.7922	127.469	112.814	42.8574	136.25	62.5117	53.1478	116.628	55.3549	143.895	92.7346	80.1788	38.6337	61.133	66.9938	76.9096	102.154	84.4511	66.227	65.0752	52.1938	71.6746
[truncated: 227 more columns]
